# Supplementary material for: Patterns of treatment-seeking behaviors among caregivers of febrile young children: a Ugandan multiple case study
Source: Springer Nature journal article supplement (doi:10.1186/s12889-016-2813-7), 2016-02-16
Supplement: MOESM1 [file 9751466]

**Table S1.** Caregivers' treatment seeking actions and sequence from point of initial symptoms<sup>a</sup>

| Cases →                      | Positive Outcome: Child Recovered                                                                                                                                                                                                                                                            |                                                                                                                                                                                                                                                                                               |                                                                                                                                                                                                                                                                          | Negative Outcome: Child Survived but with Deficits                                                                                                                                                                                                                                                                                                                                      |                                                                                                                                                                                                                                                                                                                                                              |                                                                                                                                                                                                                                                                                                                                                                                                                                 | Negative Outcome: Child Died                                                                                                                                                                                                                                                                    |                                                                                                                                                                                                                                                                                                                          |
|------------------------------|----------------------------------------------------------------------------------------------------------------------------------------------------------------------------------------------------------------------------------------------------------------------------------------------|-----------------------------------------------------------------------------------------------------------------------------------------------------------------------------------------------------------------------------------------------------------------------------------------------|--------------------------------------------------------------------------------------------------------------------------------------------------------------------------------------------------------------------------------------------------------------------------|-----------------------------------------------------------------------------------------------------------------------------------------------------------------------------------------------------------------------------------------------------------------------------------------------------------------------------------------------------------------------------------------|--------------------------------------------------------------------------------------------------------------------------------------------------------------------------------------------------------------------------------------------------------------------------------------------------------------------------------------------------------------|---------------------------------------------------------------------------------------------------------------------------------------------------------------------------------------------------------------------------------------------------------------------------------------------------------------------------------------------------------------------------------------------------------------------------------|-------------------------------------------------------------------------------------------------------------------------------------------------------------------------------------------------------------------------------------------------------------------------------------------------|--------------------------------------------------------------------------------------------------------------------------------------------------------------------------------------------------------------------------------------------------------------------------------------------------------------------------|
|                              | CS 06                                                                                                                                                                                                                                                                                        | CS 07                                                                                                                                                                                                                                                                                         | CS 08                                                                                                                                                                                                                                                                    | CS 01                                                                                                                                                                                                                                                                                                                                                                                   | CS 02                                                                                                                                                                                                                                                                                                                                                        | CS 03                                                                                                                                                                                                                                                                                                                                                                                                                           | CS 04                                                                                                                                                                                                                                                                                           | CS 05                                                                                                                                                                                                                                                                                                                    |
| <b>1<sup>st</sup> Action</b> | <p><b>Time:</b> 12 am<br/> <b>Setting:</b> Home<br/> <b>Trigger:</b> "Difficulty breathing", "wheezing", "congested", "weak", "not playing", "crying", "sneezing", "cough"<br/> <b>Blood Test:</b> No<br/> <b>Treatment:</b> None<br/> <b>Outcome:</b> Breathing worse &amp; thick mucus</p> | <p><b>Time:</b> 9 am<br/> <b>Setting:</b> Home<br/> <b>Trigger:</b> "Shivering", "sweating", "heat", stomach "bubbling", "eyes were red", "vomiting"<br/> <b>Blood Test:</b> No<br/> <b>Treatment:</b> Panadol®<br/> <b>Outcome:</b> Shivering ↓, no other improvement</p>                    | <p><b>Time:</b> 7 am<br/> <b>Setting:</b> Home<br/> <b>Trigger:</b> "Not eating", "not playing", "crying", "hot body", "rash", "mucus", "cough"<br/> <b>Blood Test:</b> No<br/> <b>Treatment:</b> Wet cloth, mululusa, Coartem®, Panadol®<br/> <b>Outcome:</b> Worse</p> | <p><b>Time:</b> 10 pm<br/> <b>Setting:</b> Home<br/> <b>Trigger:</b> "Fever", "convulsing", "not breastfeeding/eating"<br/> <b>Blood Test:</b> No<br/> <b>Treatment:</b> Wet cloth, Coartem®, Panadol®<br/> <b>Outcome:</b> Fever not relieved</p>                                                                                                                                      | <p><b>Time:</b> 4 am<br/> <b>Setting:</b> Home<br/> <b>Trigger:</b> "Fever", "eyes became red", "stayed there in such a state", "convulsing", "weak"<br/> <b>Blood Test:</b> No<br/> <b>Treatment:</b> Smearred pounded onions on body, quinine syrup<br/> <b>Outcome:</b> Fever ↓, on-going convulsions</p>                                                 | <p><b>Time:</b> 5 pm<br/> <b>Setting:</b> Home<br/> <b>Trigger:</b> "Vomit", "hot body", "eyes staring and convulsed", "stomach swollen"<br/> <b>Blood Test:</b> No<br/> <b>Treatment:</b> Smearred pounded onions<br/> <b>Outcome:</b> Eyes back to normal but still looked like a dead person</p>                                                                                                                             | <p><b>Time:</b> 4 pm<br/> <b>Setting:</b> Home<br/> <b>Trigger:</b> "Weak", "retching", "hot body", refused to eat, "breathless"<br/> <b>Blood Test:</b> No<br/> <b>Treatment:</b> Wet cloth, Panadol®, Septrin®<br/> <b>Outcome:</b> Could not stand &amp; had a weak neck</p>                 | <p><b>Time:</b> 5pm<br/> <b>Setting:</b> Home<br/> <b>Trigger:</b> "Cough", "diarrhea", "vomit", "hot body"<br/> <b>Blood Test:</b> No<br/> <b>Treatment:</b> Wet cloth<br/> <b>Outcome:</b> Fever ↓, then visited HC</p>                                                                                                |
| <b>2<sup>nd</sup> Action</b> | <p><b>Time:</b> Next day (am)<br/> <b>Setting:</b> Drug shop<br/> <b>Trigger:</b> Previous symptoms + "fever"<br/> <b>Blood test:</b> No<br/> <b>Treatment:</b> Junior Aspirin® from drug shop x 3 days, no money to buy more medicine<br/> <b>Outcome:</b> Fever resolved in 2 weeks</p>    | <p><b>Time:</b> Same day (evening) &amp; next day (morning &amp; evening)<br/> <b>Setting:</b> Drug shop<br/> <b>Trigger:</b> No improvement<br/> <b>Blood Test:</b> Yes<br/> <b>Treatment:</b> Quinine injection, quinine &amp; Panadol® tablets<br/> <b>Outcome:</b> Improved gradually</p> | <p><b>Time:</b> Next day (10 am)<br/> <b>Setting:</b> Muhuyu HC II<br/> <b>Trigger:</b> Worsened<br/> <b>Blood Test:</b> No<br/> <b>Treatment:</b> Some kind of injection, Coartem®, Panadol®, Rene Coldease®<br/> <b>Outcome:</b> No fever, cured in 3-4 days</p>       | <p><b>Time:</b> Next day (am)<br/> <b>Setting:</b> Kangalaba HC III<br/> <b>Trigger:</b> Previous symptoms + "fever"<br/> <b>Blood Test:</b> No<br/> <b>Treatment:</b> None, referred to Busiu hospital in Mbale for blood test. Told to feed milk &amp; porridge<br/> <b>Outcome:</b> Referred to Mbale hospital</p>                                                                   | <p><b>Time:</b> Same day (10 am)<br/> <b>Setting:</b> Busaba HC III<br/> <b>Trigger:</b> "Fever", "coughing", "convulsions"<br/> <b>Blood Test:</b> Yes<br/> <b>Treatment:</b> Septrin®, quinine tablets, Panadol® tablets, and told to buy quinine syrup<br/> <b>Outcome:</b> Told has cerebral malaria (with convulsions), convulsions ↑ to 8-15 x day</p> | <p><b>Time:</b> Next day (10 am) &amp; following day (10 am)<br/> <b>Setting:</b> Drug shop<br/> <b>Trigger:</b> "Vomit", "convulsions", "hot body", "blank stare", "swollen stomach"<br/> <b>Blood Test:</b> No<br/> <b>Treatment:</b> Told has cerebral malaria. Injections x 2 days, tablets: ibuprofen, 4 green, 6 white, 8 Panadol®<br/> <b>Outcome:</b> Cured in 2 weeks. Still has swollen stomach &amp; convulsions</p> | <p><b>Time:</b> Next day (7 am)<br/> <b>Setting:</b> Nabiganda HC II<br/> <b>Trigger:</b> Worsened<br/> <b>Blood Test:</b> No<br/> <b>Treatment:</b> None, told could not treat before receiving blood transfusion. Referred to Mbale hospital<br/> <b>Outcome:</b> Travelled to Mbale</p>      | <p><b>Time:</b> Same day (6 pm)<br/> <b>Setting:</b> Nakwasi HC III<br/> <b>Trigger:</b> "Cough", "diarrhea", "vomit"<br/> <b>Blood Test:</b> No<br/> <b>Treatment:</b> Coartem®. Told to buy quinine syrup from drug shop<br/> <b>Outcome:</b> Symptoms not improve, body started to swell &amp; condition worsened</p> |
| <b>3<sup>rd</sup> Action</b> | X                                                                                                                                                                                                                                                                                            | X                                                                                                                                                                                                                                                                                             | X                                                                                                                                                                                                                                                                        | <p><b>Time:</b> Same day<br/> <b>Setting:</b> Admitted in Mbale x 3 days<br/> <b>Trigger:</b> Referred<br/> <b>Blood Test:</b> Yes<br/> <b>Treatment:</b> Blood transfusion. Told to buy water for drip, 6 quinine injections, paracetamol, quinine syrup x 2 weeks, plus other pills<br/> <b>Outcome:</b> Improved but sight affected, left hand became lame, on-going convulsions</p> | <p><b>Time:</b> 2 weeks later<br/> <b>Setting:</b> Drug shop &amp; Busaba HC III<br/> <b>Trigger:</b> Daily convulsions 8-15 x day<br/> <b>Blood Test:</b> No<br/> <b>Treatment:</b> Quinine syrup daily x 1 year from drug shop &amp; Busaba HC<br/> <b>Outcome:</b> Child stopped talking after 1 year</p>                                                 | X                                                                                                                                                                                                                                                                                                                                                                                                                               | <p><b>Time:</b> Same day (~2 ½ hours later at 11 am)<br/> <b>Setting:</b> Mbale hospital<br/> <b>Trigger:</b> Referred<br/> <b>Blood Test:</b> Yes<br/> <b>Treatment:</b> None started for 2 hours while at the hospital<br/> <b>Outcome:</b> Waited for 2 hours for treatment - child died</p> | <p><b>Time:</b> 2 weeks later<br/> <b>Setting:</b> Nakwasi HC III<br/> <b>Trigger:</b> Worse, body started to swell<br/> <b>Blood Test:</b> No<br/> <b>Treatment:</b> Coartem® plus quinine syrup from drug shop<br/> <b>Outcome:</b> No improvement</p>                                                                 |
| <b>4<sup>th</sup> Action</b> | X                                                                                                                                                                                                                                                                                            | X                                                                                                                                                                                                                                                                                             | X                                                                                                                                                                                                                                                                        | <p><b>Managing Negative Outcome</b><br/> <b>Time:</b> 2 days later<br/> <b>Setting:</b> Tororo hospital<br/> <b>Trigger:</b> Decreased vision<br/> <b>Blood Test:</b> No<br/> <b>Treatment:</b> None<br/> <b>Outcome:</b> Told quinine caused child to become lame &amp; affected eyesight</p>                                                                                          | <p><b>Time:</b> 1 year later<br/> <b>Setting:</b> Home<br/> <b>Trigger:</b> Child not talking<br/> <b>Blood Test:</b> No<br/> <b>Treatment:</b> Stopped quinine, started mululusa &amp; tomato leaves baths x 1 month, then gave up<br/> <b>Outcome:</b> Month later visited Budumba HC III when a friend told her convulsion drugs available there</p>      | X                                                                                                                                                                                                                                                                                                                                                                                                                               | X                                                                                                                                                                                                                                                                                               | <p><b>Time:</b> 1 month later<br/> <b>Setting:</b> Nakwasi HC III<br/> <b>Trigger:</b> No improvement<br/> <b>Blood Test:</b> No<br/> <b>Treatment:</b> Coartem®. Told to buy quinine syrup &amp; other medicines from drug shop<br/> <b>Outcome:</b> Improved, but then fell ill again ~3 months later</p>              |
| <b>5<sup>th</sup> Action</b> | X                                                                                                                                                                                                                                                                                            | X                                                                                                                                                                                                                                                                                             | X                                                                                                                                                                                                                                                                        | <p><b>Managing Negative Outcome</b><br/> <b>Time:</b> 1 month later<br/> <b>Setting:</b> Mbale hospital<br/> <b>Blood Test:</b> No<br/> <b>Trigger:</b> Examine eyes/lame hand<br/> <b>Treatment:</b> None<br/> <b>Outcome:</b> Told nothing could be done: look after child, feed passion fruits &amp; milk</p>                                                                        | <p><b>Time:</b> 5 months later<br/> <b>Setting:</b> Busolwe hospital<br/> <b>Trigger:</b> Referred from Budumba HC III<br/> <b>Blood Test:</b> No<br/> <b>Treatment:</b> Quinine injection, convulsion tablets refilled weekly<br/> <b>Outcome:</b> On-going convulsions but less frequent</p>                                                               | X                                                                                                                                                                                                                                                                                                                                                                                                                               | X                                                                                                                                                                                                                                                                                               | <p><b>Time:</b> ~3 months later<br/> <b>Setting:</b> Drug shop<br/> <b>Trigger:</b> Sick again &amp; Nakwasi HC III closed<br/> <b>Blood Test:</b> No<br/> <b>Treatment:</b> For worms<br/> <b>Outcome:</b> Thought was improving but later that day vomited blood &amp; died</p>                                        |

<sup>a</sup>Abbreviation Health Centre (HC).
